# Supplementary material for: Peroxidase activity of the coronene bisimide supramolecular architecture and its applications in colorimetric sensing of H2O2 and glucose
Source: Royal Society of Chemistry journal article supplement (doi:10.1039/c7tb00212b), 2017-01-01
Supplement: c7tb00212b1.pdf [file c7tb00212b1.pdf]

## Supporting Information

### **Peroxidase Activity of the Coronene Bisimide Supramolecular Architecture and the Applications in Colorimetric Sensing of H<sub>2</sub>O<sub>2</sub> and Glucose**

Meiding Yang,<sup>ab</sup> Huipeng Zhou,<sup>\*ab</sup> Yongxin Li,<sup>ab</sup> Qingfeng Zhang,<sup>ab</sup> Juanmin Li,<sup>ab</sup>  
Cuiyun Zhang,<sup>abc</sup> Chuibei Zhou<sup>a</sup> and Cong Yu<sup>\*ab</sup>

*<sup>a</sup>State Key Laboratory of Electroanalytical Chemistry, Changchun Institute of Applied  
Chemistry, Chinese Academy of Sciences, Changchun 130022, P. R. China*

*<sup>b</sup>University of Chinese Academy of Sciences, Beijing 100049, P. R. China*

*<sup>c</sup>School of Materials Science and Engineering, Tianjin University, Tianjin 300072, P.  
R. China*

\*To whom correspondence should be addressed

E-mail: congyu@ciac.ac.cn; hpzhou@ciac.ac.cn

Fax: (+86) 431-8526-2710

## **Experimental section**

### ***Optimization of the $H_2O_2$ assay***

#### **The effect of CTDI concentration**

The catalytic activity of CTDI was studied. TMB,  $H_2O_2$  and different amounts of CTDI were added to the sample buffer solution, mixed briefly and incubated in a 37 °C water bath for 2 h. The absorption spectra were measured, and the intensity changes of the absorbance maximum of the oxidized TMB at 652 nm were followed. Final concentrations: TMB, 500  $\mu$ M;  $H_2O_2$ , 100  $\mu$ M; CTDI, 0, 5, 10, 15, 20, 25 and 30  $\mu$ M, respectively; buffer, 50 mM HAc-NaAc, pH 5.0; total sample volume, 200  $\mu$ L.

#### **The effect of buffer pH value**

TMB and  $H_2O_2$  were added to buffer solutions of different pH value in the absence or presence of CTDI. The sample solutions were mixed briefly and incubated in a 37 °C water bath for 2 h, and the absorption spectra were recorded. Conditions: TMB, 500  $\mu$ M;  $H_2O_2$ , 100  $\mu$ M; CTDI, 20  $\mu$ M; buffer, 50 mM, NaAc-HAc, pH 3.5, 4.0, 4.5, 5.0, 5.5;  $Na_2HPO_4$ - $NaH_2PO_4$ , pH 6.0, 6.5, 7.0.

#### **The effect of buffer concentration**

A HAc-NaAc buffer solution of different concentrations (Final concentrations: 5 – 60 mM, pH 5.0) was added to a sample solution containing 500  $\mu$ M TMB, 100  $\mu$ M  $H_2O_2$  and 20  $\mu$ M CTDI, mixed briefly and incubated in a 37 °C water bath for 2 h, and the absorption spectra were recorded.

### **The effect of reaction time**

H<sub>2</sub>O<sub>2</sub> of various concentrations (Final concentrations: 0, 10, 100, 300, 500 μM, respectively) was added to the sample buffer solution containing 500 μM TMB and 20 μM CTDI. The sample solutions were incubated at 37 °C and the absorption spectra were recorded at different incubation time (0 – 150 min, buffer, 50 mM HAc-NaAc, pH 5.0).

### **Kinetic assay**

The peroxidase-like catalytic activity of the CTDI nanofibers was studied. The assay was conducted using 20 μM CTDI in buffer solution (50 mM, NaAc-HAc, pH 5.0, 37 °C). TMB concentration was kept constant (0.5 mM) and H<sub>2</sub>O<sub>2</sub> concentration was varied. Then H<sub>2</sub>O<sub>2</sub> concentration was kept constant (50 mM) and TMB concentration was varied. The reactions were monitored via the UV-vis absorption changes at 652 nm. The reaction rates were calculated (molar extinction coefficient of oxidized TMB: 39,000 M<sup>-1</sup>·cm<sup>-1</sup>). The Michaelis–Menten constant was calculated using the Lineweaver–Burk plot:  $1/v = K_m/V_{max} \cdot (1/[S] + 1/K_m)$ , where  $v$  is the initial reaction velocity,  $V_{max}$  is the maximal reaction velocity, and  $[S]$  is the concentration of the substrate.

### ***Optimization of the glucose assay***

#### **The effect of GOx concentration**

GOx of various concentrations (Final concentrations: 0, 0.01, 0.05, 0.1, 0.25, 0.5, 0.75, 1, 1.25, 1.5, 2.5, 5 U/mL, respectively) was added to the sample solution containing 100  $\mu$ M glucose, 500  $\mu$ M TMB, and 20  $\mu$ M CTDI. Samples were incubated in a 37 °C water bath for 2 h and the absorption spectra were recorded (buffer, 50 mM HAc-NaAc, pH 5.0).

### **The effect of reaction time**

Glucose and GOx were added to the sample solutions containing TMB and CTDI. Samples were incubated at 37 °C and the absorption spectra were recorded at a certain period of time (0, 10, 20, 30, 40, 50, 60, 70, 80, 90, 100, 110 and 120 min, respectively). Final concentrations: glucose, 25  $\mu$ M; GOx, 0.5 U/mL; TMB, 500  $\mu$ M; CTDI, 20  $\mu$ M; buffer, 50 mM HAc-NaAc, pH 5.0.

### **Reuse of the nanofibers catalyst**

CTDI, TMB and GOx were added to dilute human blood sample solutions. Samples were incubated at 37 °C for 2 h and the absorption spectra were recorded. After the reaction, the sample solutions were passed through a filter (MWCO: 100 kD) via centrifugation at 10,000 rpm for 5 min. The CTDI catalyst was separated and washed two times with water, and used for another cycle of the catalytic reaction. Final concentrations: CTDI, 20  $\mu$ M; GOx, 0.5 U/mL; TMB, 500  $\mu$ M; buffer, 50 mM HAc-NaAc, pH 5.0.

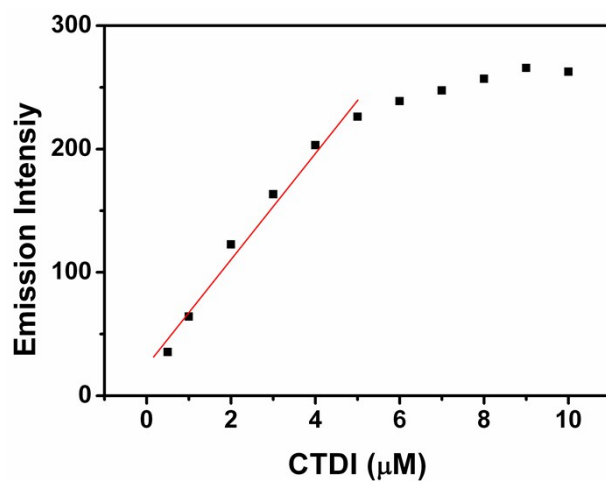

**Fig. S1** Changes in emission intensity of CTDI at 492 nm in ethanol with concentration.

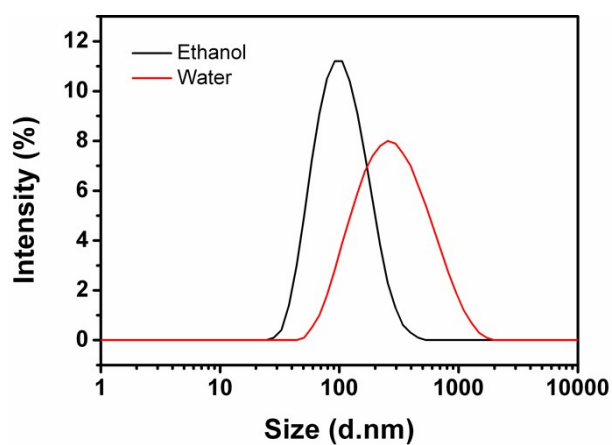

**Fig. S2** DLS: size distribution of 10  $\mu\text{M}$  CTDI in ethanol and water solution.

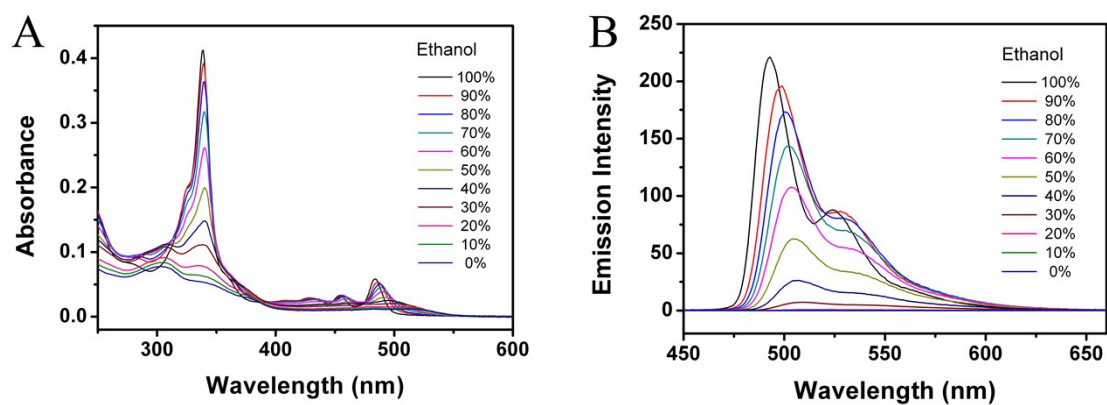

**Fig. S3** Changes in UV-vis absorption (A) and emission (B) spectra of 5  $\mu$ M CTDI in ethanol – water solvent mixture with ethanol concentration.

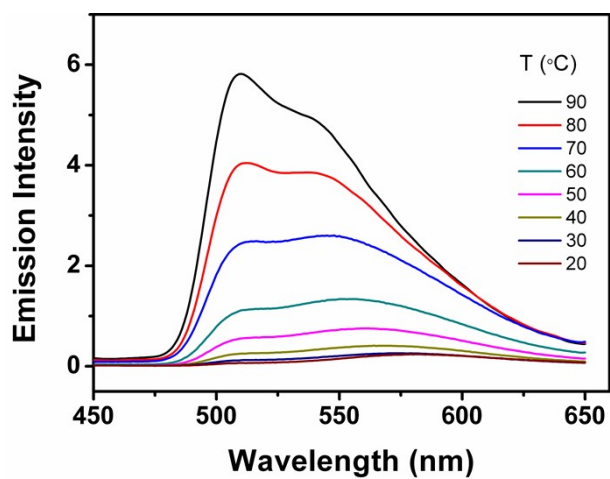

**Fig. S4** Changes in emission spectrum of 5  $\mu$ M CTDI in water at different temperatures. The solution temperature was increased from 20 to 90 °C.

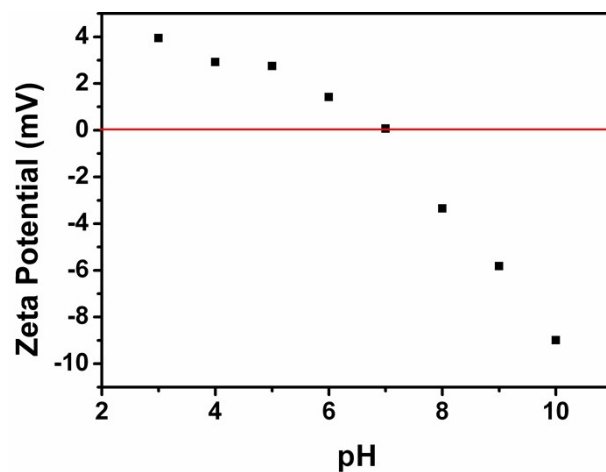

**Fig. S5** Zeta potential value changes of the CTDI nanofibers in different buffer solutions. Conditions: 25 mM buffer, NaAc-HAc, pH 3.0 – 5.0;  $\text{Na}_2\text{HPO}_4\text{-NaH}_2\text{PO}_4$ , pH 6.0 – 9.0;  $\text{Na}_2\text{CO}_3\text{-NaHCO}_3$ , pH 10.0.

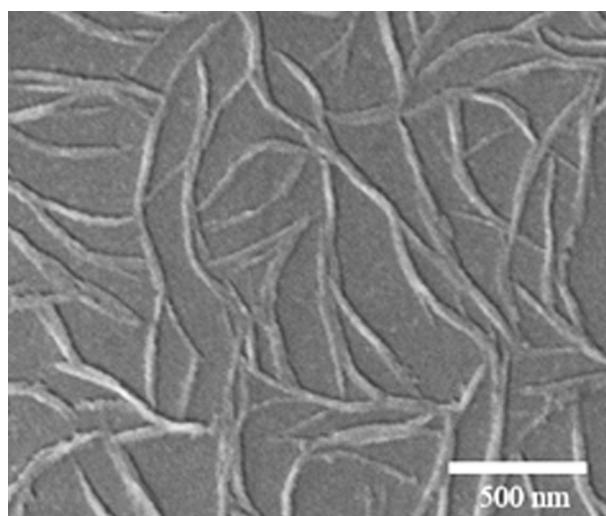

**Fig. S6** SEM images of the self-assembled CTDI nanofibers in ethanol.

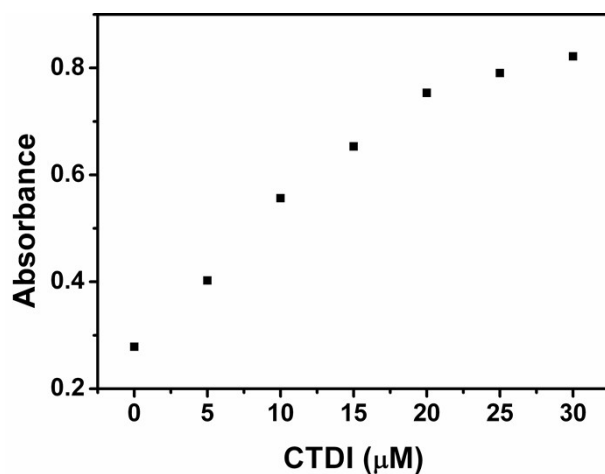

**Fig. S7** Changes in maximum absorption of TMB (at 652 nm) with CTDI concentration. Sample mixture contains 500 μM TMB and 100 μM H<sub>2</sub>O<sub>2</sub>.

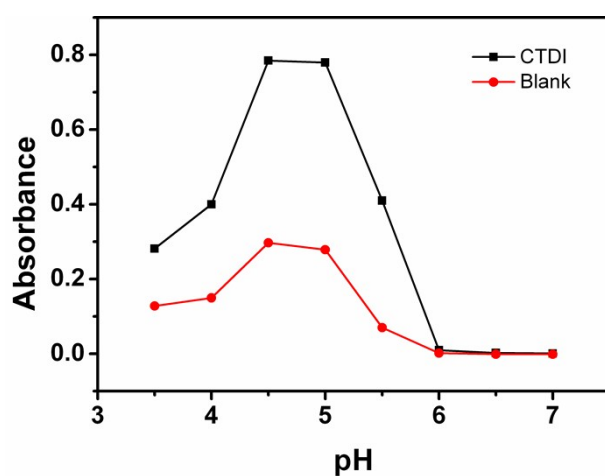

**Fig. S8** Changes in maximum absorption of TMB at 652 nm with assay solution buffer pH value in the presence or absence of CTDI (blank control). Conditions: TMB, 500 μM; H<sub>2</sub>O<sub>2</sub>, 100 μM; CTDI, 20 μM; buffer, 50 mM, NaAc-HAc, pH 3.5 – 5.5; Na<sub>2</sub>HPO<sub>4</sub>-NaH<sub>2</sub>PO<sub>4</sub>, pH 6.0 – 7.0.

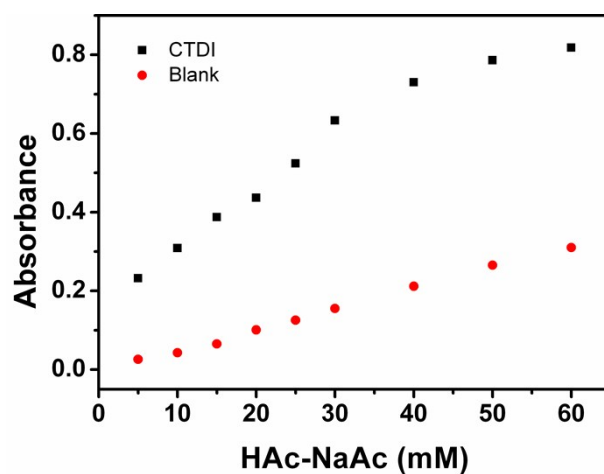

**Fig. S9** Changes in maximum absorption of TMB at 652 nm with buffer concentration in the presence or absence of CTDI (blank control). Conditions: TMB, 500  $\mu\text{M}$ ;  $\text{H}_2\text{O}_2$ , 100  $\mu\text{M}$ ; CTDI, 20  $\mu\text{M}$ ; buffer: 5 – 60 mM NaAc-HAc, pH 5.0.

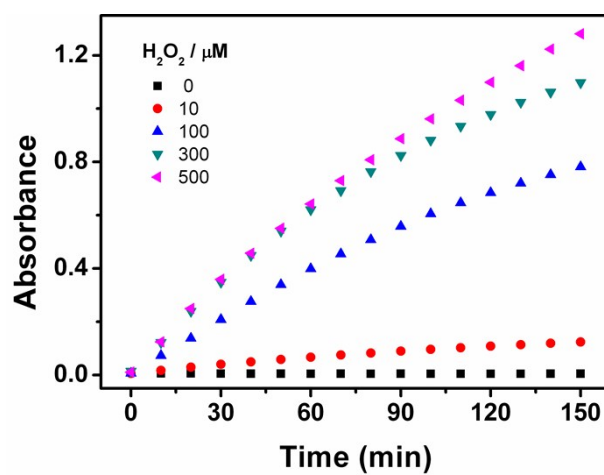

**Fig. S10** Changes in TMB maximum UV-vis absorption at 652 nm with reaction time.

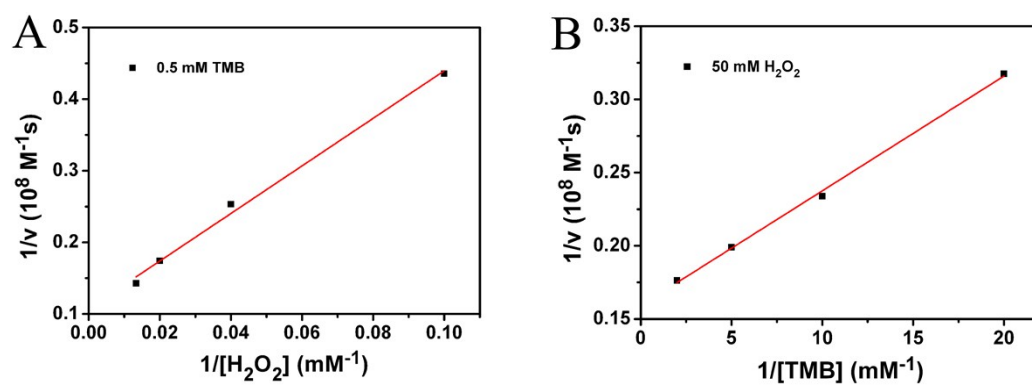

**Fig. S11** Double-reciprocal plots for the CTDI nanofibers catalytic reaction. (A) TMB concentration was kept constant (0.5 mM),  $H_2O_2$  concentration was varied; (B)  $H_2O_2$  concentration was kept constant (50 mM), TMB concentration was varied. Conditions: CTDI, 20  $\mu\text{M}$ ; buffer, 50 mM, NaAc-HAc, pH 5.0.

**Table S1.** Comparison of the kinetic parameters ( $K_m$  and  $V_{max}$ ) of the natural enzyme HRP and some carbon-based artificial peroxidase.

| Catalyst                                   | Substance              | $K_m$ (mM) | $V_{max}$ ( $10^{-8} \text{ M}\cdot\text{s}^{-1}$ ) | Ref.      |
|--------------------------------------------|------------------------|------------|-----------------------------------------------------|-----------|
| CTDI                                       | TMB                    | 0.049      | 6.28                                                | This work |
| nanofibers                                 | $\text{H}_2\text{O}_2$ | 30.85      | 9.29                                                |           |
| GO-COOH                                    | TMB                    | 0.024      | 3.45                                                | 19        |
|                                            | $\text{H}_2\text{O}_2$ | 3.99       | 3.85                                                |           |
| HRP                                        | TMB                    | 0.275      | 1.24                                                | 19        |
|                                            | $\text{H}_2\text{O}_2$ | 0.214      | 2.46                                                |           |
| C-Dots                                     | TMB                    | 0.039      | 3.61                                                | 22        |
|                                            | $\text{H}_2\text{O}_2$ | 26.77      | 30.61                                               |           |
| $\text{C}_{60}[\text{C}(\text{COOH})_2]_2$ | TMB                    | 0.233      | 0.347                                               | 32        |
|                                            | $\text{H}_2\text{O}_2$ | 24.58      | 0.401                                               |           |

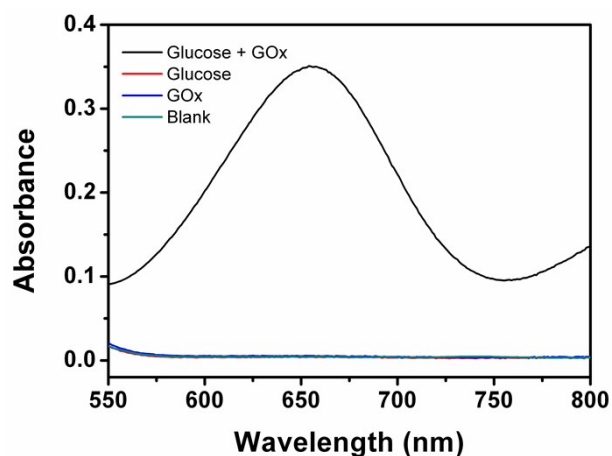

**Fig. S12** Changes in UV-vis absorption spectrum of TMB (500  $\mu$ M) in the presence of 500  $\mu$ M glucose + 125 mU/mL GOx; 500  $\mu$ M glucose; or 125 mU/mL GOx. CTDI: 20  $\mu$ M. Blank curve is the UV-vis absorption spectrum of TMB (500  $\mu$ M) in the presence of 20  $\mu$ M CTDI.

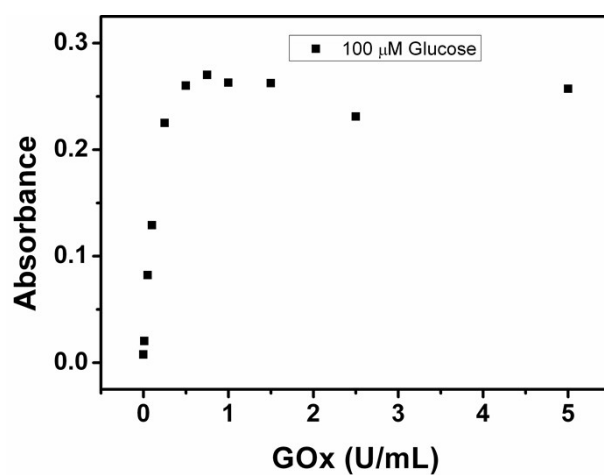

**Fig. S13** The TMB absorption intensity changes at 652 nm with GOx concentration.

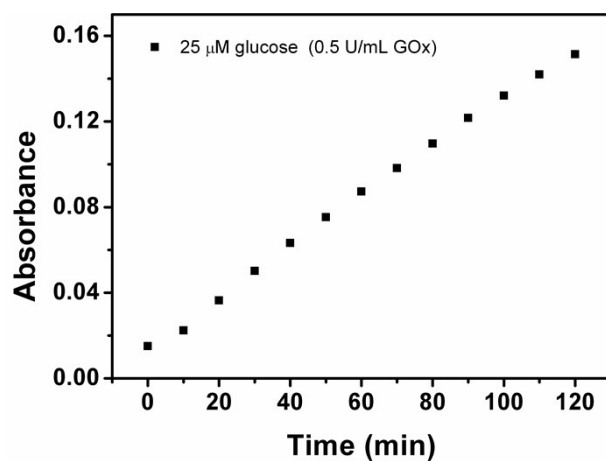

**Fig. S14** Changes in TMB absorption value at 652 nm with reaction time. Conditions: 500  $\mu\text{M}$  TMB, 20  $\mu\text{M}$  CTDI.

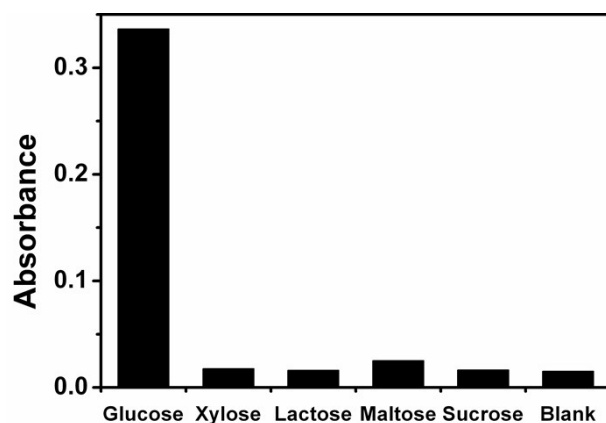

**Fig. S15** Selectivity of the glucose assay. Final concentrations: TMB, 500  $\mu\text{M}$ ; CTDI, 20  $\mu\text{M}$ ; GOx, 0.5 U/mL; glucose, xylose, lactose, maltose, sucrose, 200  $\mu\text{M}$  each.

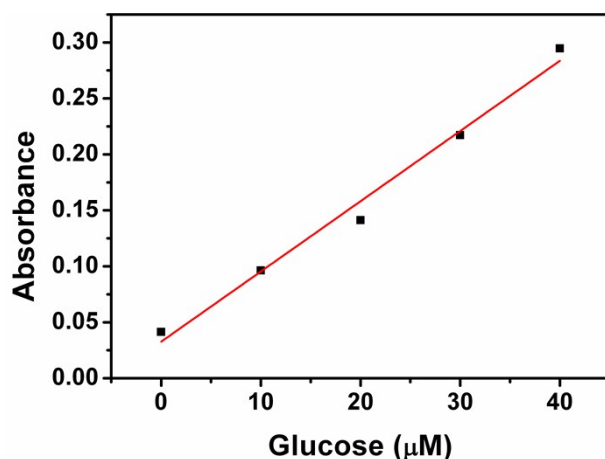

**Fig. S16** Maximum TMB absorption value changes at 652 nm with glucose concentration in dilute blood sample. The spiked glucose concentration: 0, 10, 20, 30, 40 μM ( $A_{652} = 0.0063C + 0.033$ , correlation coefficient  $R^2 = 0.983$ ).

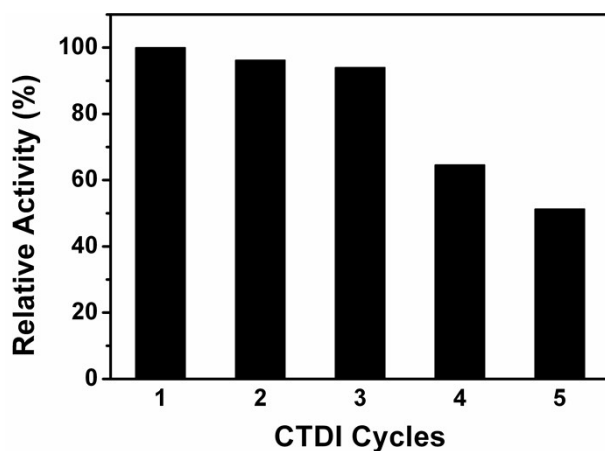

**Fig. S17** Catalytic performance of the nanofibers catalyst after several cycles of reuse in dilute blood sample. After each round of reaction, the catalyst was separated via passing through a filter (MWCO: 100 kD), and used for another cycle of the catalytic reaction. Final concentrations: CTDI, 20 μM; GOx, 0.5 U/mL; TMB, 500 μM; buffer, 50 mM HAc-NaAc, pH 5.0.

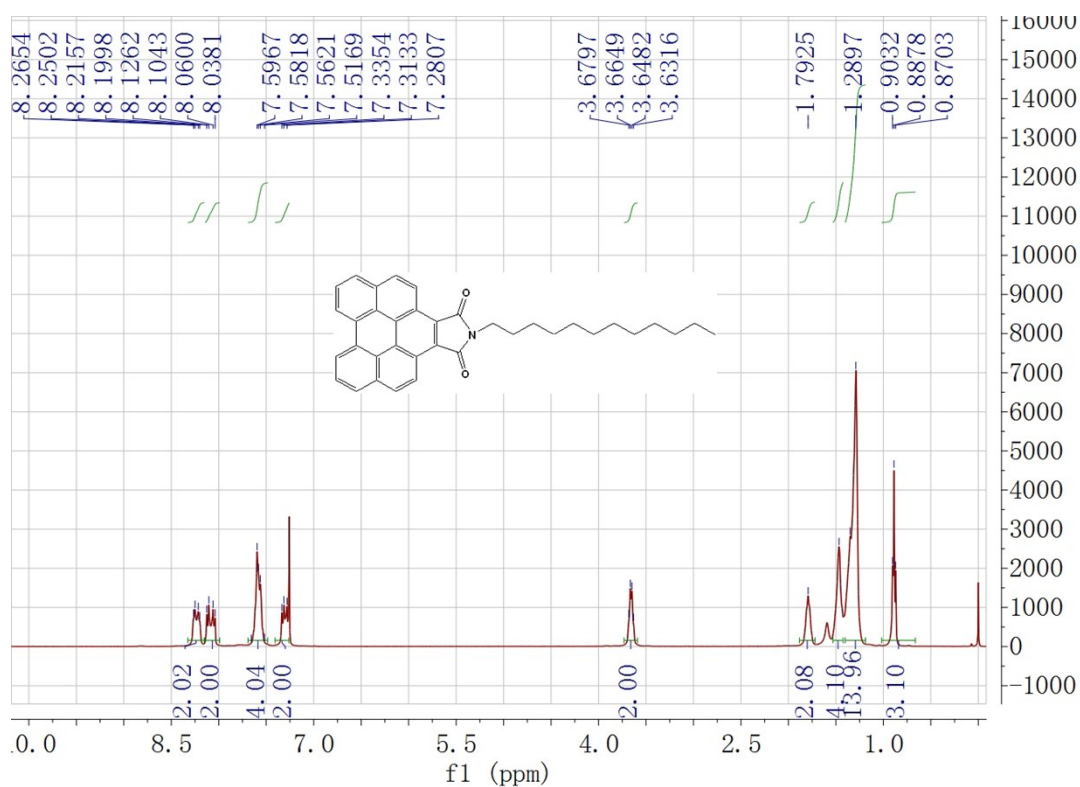

**Fig. S18** <sup>1</sup>H NMR spectrum of compound **2**.

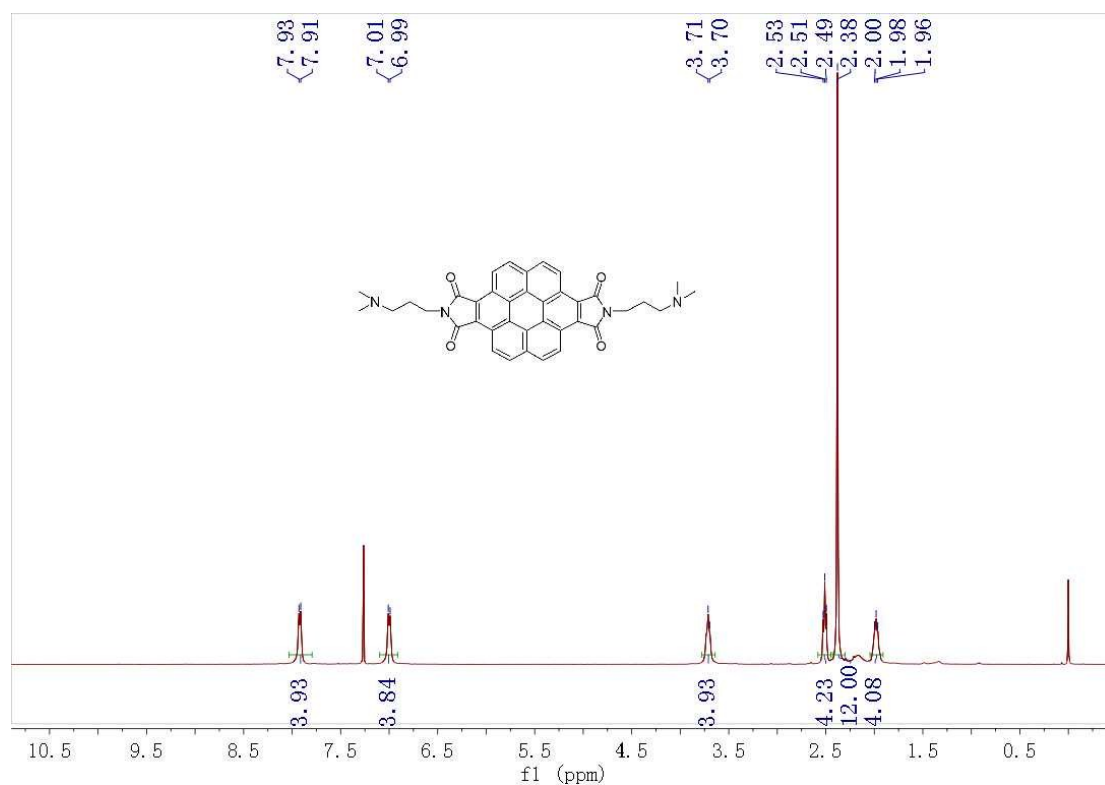

**Fig. S19** <sup>1</sup>H NMR spectrum of compound **5**.

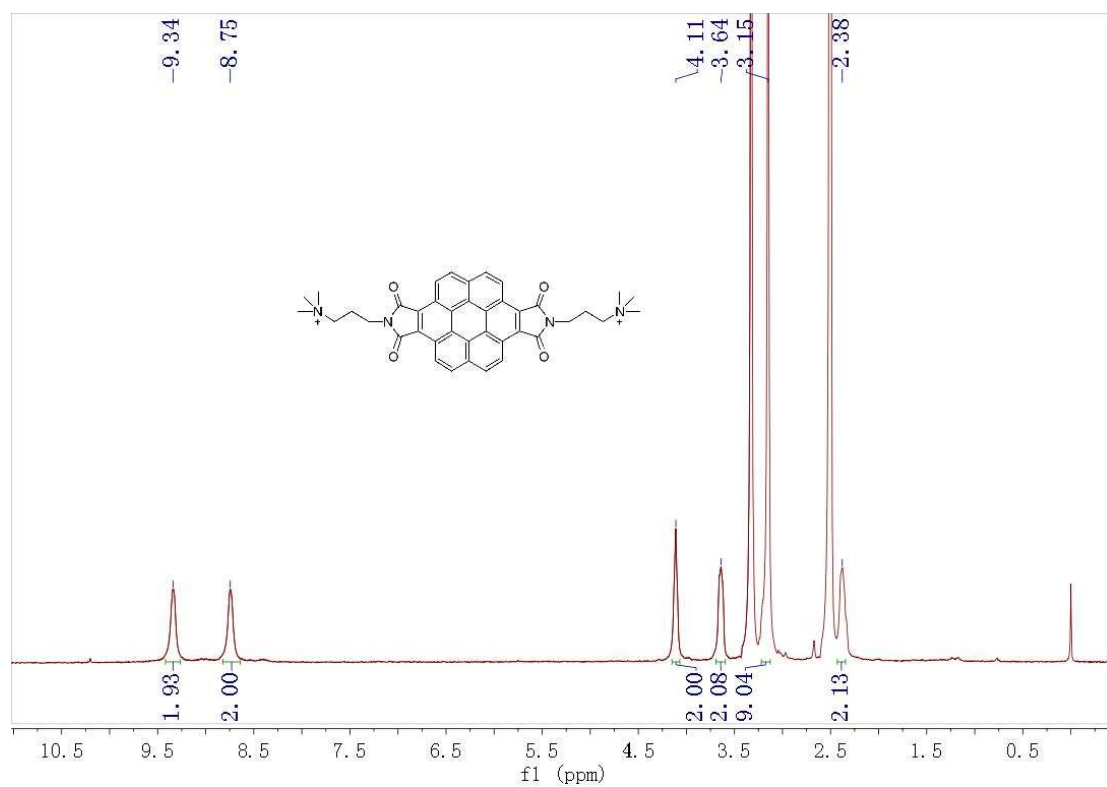

**Fig. S20**  $^1\text{H}$  NMR spectrum of CTDI.

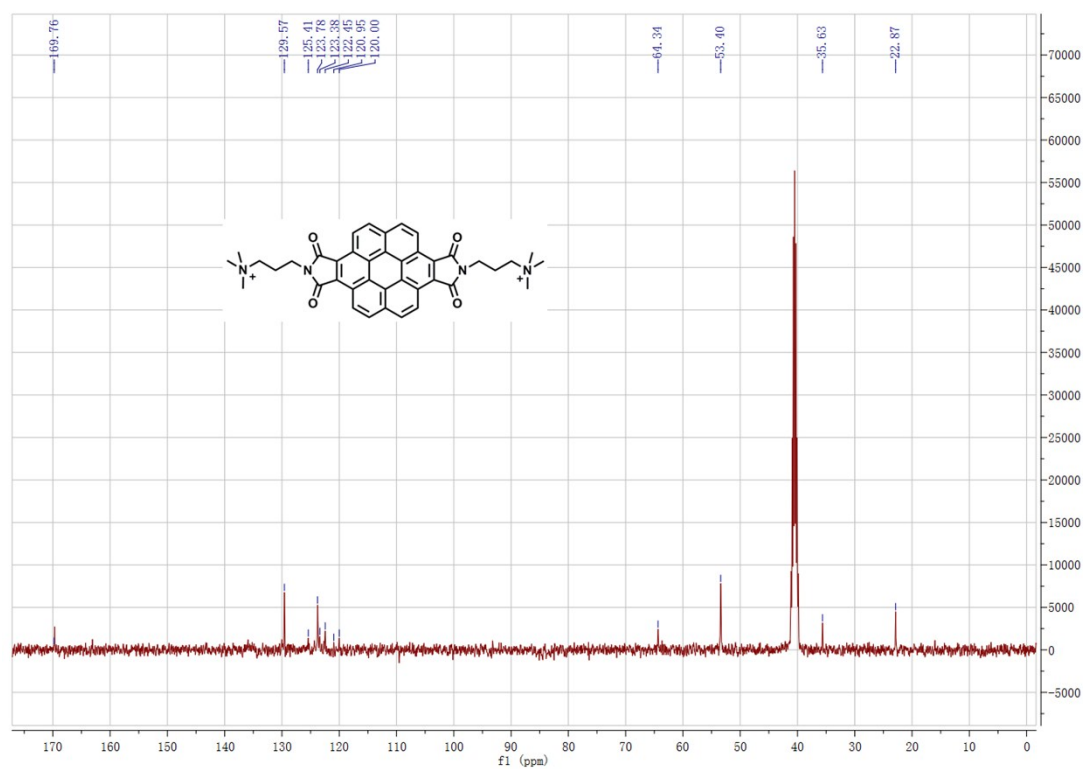

**Fig. S21**  $^{13}\text{C}$  NMR spectrum of CTDI.

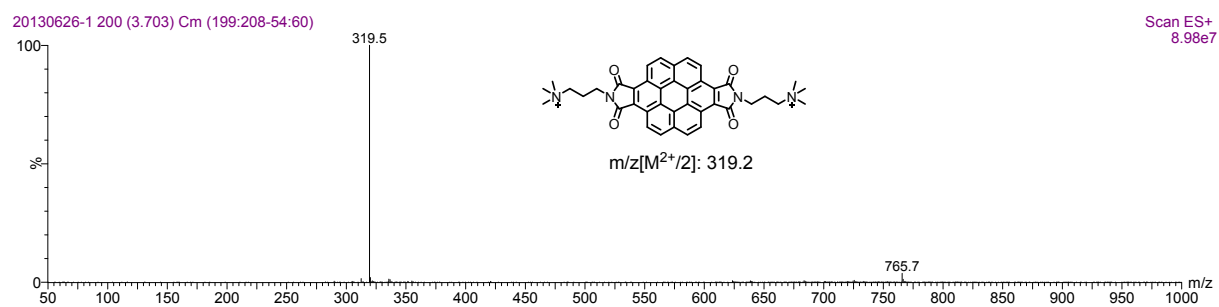

**Fig. S22** Electrospray ionization mass spectrum of CTDI.
